# Supplementary material for: PdII-mediated integration of isocyanides and azide ions might proceed via formal 1,3-dipolar cycloaddition between RNC ligands and uncomplexed azide
Source: Royal Society of Chemistry journal article supplement (doi:10.1039/c5nj02564h), 2015-11-06
Supplement: c5nj02564h1.pdf [file c5nj02564h1.pdf]

## Supplementary Information

### **Pd<sup>II</sup>-mediated Integration of Isocyanides and Azide Ion Might Proceed via Formal 1,3-Dipolar Cycloaddition between RNCs Ligands and Uncomplexed Azide**

**Mikhail A. Kinzhalov,<sup>a</sup> Alexander S. Novikov,<sup>a</sup> Konstantin V. Luzyanin,<sup>a,b</sup>**

**Matti Haukka,<sup>c</sup> Armando J. L. Pombeiro,<sup>d</sup> Vadim Yu. Kukushkin<sup>a,\*</sup>**

St. Petersburg State University, 7-9, Universitetskaya nab., St. Petersburg, 199034 Russia,  
University of Liverpool, Crown Street, Liverpool L69 7ZD, United Kingdom; Department of  
Chemistry, University of Jyväskylä, P.O. Box 35, FI-40014, Finland; Centro de Química  
Estrutural, Complexo I, Instituto Superior Técnico, TU Lisbon, Av. Rovisco Pais, 1049-001  
Lisbon, Portugal.

(a) Saint Petersburg State University. E-mail: kukushkin@VK2100.spb.edu; (b) University of  
Liverpool; (c) University of Jyväskylä; (d) Instituto Superior Técnico.

## **Contents**

Crystal Data (**Table S1**)

Calculated total energies, enthalpies, Gibbs free energies and entropies in gas phase and CH<sub>2</sub>Cl<sub>2</sub> solution (**Table S2**)

Calculated total activation and reaction energies, enthalpies and Gibbs free energies of activation and reaction for the gas phase and CH<sub>2</sub>Cl<sub>2</sub> solution (**Table S3**)

Cartesian atomic coordinates of the calculated equilibrium structures (**Table S4**)

**Table S1.** Crystal Data.

| <b>4</b>                                  |                                                                  |
|-------------------------------------------|------------------------------------------------------------------|
| empirical formula                         | C <sub>47</sub> H <sub>53</sub> ClN <sub>4</sub> OP <sub>2</sub> |
| fw                                        | 893.72                                                           |
| temp (K)                                  | 123(2)                                                           |
| $\lambda$ (Å)                             | 0.71073                                                          |
| cryst syst                                | Monoclinic                                                       |
| space group                               | P2 <sub>1</sub> /c                                               |
| <i>a</i> (Å)                              | 12.9196(3)                                                       |
| <i>b</i> (Å)                              | 13.3903(3)                                                       |
| <i>c</i> (Å)                              | 25.3747(4)                                                       |
| $\beta$ (deg)                             | 95.4960(10)                                                      |
| <i>V</i> (Å <sup>3</sup> )                | 4369.57(16)                                                      |
| <i>Z</i>                                  | 4                                                                |
| $\rho_{\text{calc}}$ (Mg/m <sup>3</sup> ) | 1.359                                                            |
| $\mu$ (Mo $K\alpha$ ) (mm <sup>-1</sup> ) | 0.599                                                            |
| No. reflns.                               | 31011                                                            |
| Unique reflns.                            | 11689                                                            |
| GOOF (F <sup>2</sup> )                    | 1.060                                                            |
| R <sub>int</sub>                          | 0.0354                                                           |
| R1 <sup>a</sup> ( <i>I</i> ≥ 2σ)          | 0.0411                                                           |
| wR2 <sup>b</sup> ( <i>I</i> ≥ 2σ)         | 0.0860                                                           |

<sup>a</sup>  $R1 = \Sigma||F_o| - |F_c||/\Sigma|F_o|$ . <sup>b</sup>  $wR2 = [\Sigma[w(F_o^2 - F_c^2)^2]/\Sigma[w(F_o^2)^2]]^{1/2}$ .

$$\Delta S_1 = R \ln V_{m,liq}^s / V_{m,gas} \quad (1)$$

$$\Delta S_2 = R \ln V_m^o / V_{m,liq}^s \quad (2)$$

$$\alpha = \frac{S^{o,s}_{liq} - (S^{o,s}_{gas} + R \ln V_{m,liq}^s / V_{m,gas})}{(S^{o,s}_{gas} + R \ln V_{m,liq}^s / V_{m,gas})} \quad (3)$$

$$S_s = S_g + \Delta S_{sol} = S_g + [\Delta S_1 + \alpha(S_g + \Delta S_1) + \Delta S_2] =$$

$$S_g + [(-11.80 \text{ cal/mol}\cdot\text{K}) - 0.21(S_g - 11.80 \text{ cal/mol}\cdot\text{K}) + 5.45 \text{ cal/mol}\cdot\text{K}] \quad (4),$$

where  $S_g$  = gas-phase entropy of solute,  $\Delta S_{sol}$  = solvation entropy,  $S^{o,s}_{liq}$ ,  $S^{o,s}_{gas}$ , and  $V_{m,liq}^s$  = standard entropies and molar volume of the solvent in liquid or gas phases (173.84 and 270.28 J/mol·K and 64.15 mL/mol, respectively, for CH<sub>2</sub>Cl<sub>2</sub>),  $V_{m,gas}$  = molar volume of the ideal gas at 25 °C (24450 mL/mol),  $V_m^o$  = molar volume of the solution corresponding to the standard conditions (1000 mL/mol). The enthalpies and Gibbs free energies in solution ( $H_s$  and  $G_s$ ) were estimated using the expressions (5) and (6)

$$H_s = E_s(6-311+G(d,p)) - E_g(6-311+G(d,p)) + H_g(6-31G(d)) \quad (5)$$

$$G_s = H_s - TS_s \quad (6),$$

where  $E_s$ ,  $E_g$  and  $H_g$  are the total energies in solution and in gas phase and gas-phase enthalpy calculated at the corresponding level.

**Table S2.** Calculated total energies ( $E_g$ ,  $E_s$ ), enthalpies ( $H_g$ ,  $H_s$ ), Gibbs free energies ( $G_g$ ,  $G_s$ ) (in Hartree) and entropies ( $S_g$ ,  $S_s$ ) (in cal/mol•K) in gas phase and  $\text{CH}_2\text{Cl}_2$  solution, respectively.

| Compound                                                              | $E_g$<br>(6-31G(d)) | $E_g$<br>(6-311+G(d,p)) | $E_s$        | $H_g$<br>(6-31G(d)) | $H_s$        | $S_g$<br>(6-31G(d)) | $S_s$  | $G_g$<br>(6-31G(d)) | $G_s$        |
|-----------------------------------------------------------------------|---------------------|-------------------------|--------------|---------------------|--------------|---------------------|--------|---------------------|--------------|
| <i>Metal-free</i>                                                     |                     |                         |              |                     |              |                     |        |                     |              |
| $\text{N}_3^-$                                                        | -164.213093         | -164.287117             | -164.388756  | -164.198438         | -164.300077  | 50.75               | 36.22  | -164.222550         | -164.317286  |
| CNMe                                                                  | -132.716573         | -132.759464             | -132.770337  | -132.666337         | -132.677211  | 60.92               | 44.26  | -132.695283         | -132.698238  |
| <b>TS<sub>metal-free</sub></b>                                        | -296.905176         | -297.016460             | -297.107218  | -296.841934         | -296.932692  | 76.09               | 56.24  | -296.878086         | -296.959411  |
| $\text{CN}_4\text{Me}$                                                | -296.947371         | -297.055136             | -297.157429  | -296.880387         | -296.982680  | 72.65               | 53.52  | -296.914906         | -297.008110  |
| <b>TS5<sub>metal-free</sub></b>                                       | -296.930296         | -297.037320             | -297.134113  | -296.866355         | -296.963148  | 78.79               | 58.37  | -296.903789         | -296.990882  |
| $\text{N}_2$                                                          | -109.524129         | -109.560542             | -109.561290  | -109.515226         | -109.515974  | 45.79               | 32.30  | -109.536981         | -109.531322  |
| $\text{N}=\text{C}=\text{NMe}^-$                                      | -187.504976         | -187.585540             | -187.684234  | -187.450586         | -187.549280  | 67.14               | 49.17  | -187.482488         | -187.572642  |
|                                                                       |                     |                         |              |                     |              |                     |        |                     |              |
| <i>Pd</i>                                                             |                     |                         |              |                     |              |                     |        |                     |              |
| <i>trans</i> -[PdCl(PH <sub>3</sub> ) <sub>2</sub> CNMe] <sup>+</sup> | -1407.036570        | -1407.164141            | -1407.236197 | -1406.916083        | -1406.988139 | 120.88              | 91.62  | -1406.973515        | -1407.031671 |
| <b>OC1</b>                                                            | -1571.419278        | -1571.599233            | -1571.624758 | -1571.282839        | -1571.308364 | 135.09              | 102.85 | -1571.347026        | -1571.357231 |
| <b>OC2</b>                                                            | -1571.425821        | -1571.606221            | -1571.622197 | -1571.290193        | -1571.306169 | 145.35              | 110.95 | -1571.359255        | -1571.358887 |
| <b>TS1</b>                                                            | -1571.411935        | -1571.593010            | -1571.619287 | -1571.276903        | -1571.303180 | 132.59              | 100.87 | -1571.339901        | -1571.351109 |
| <b>INT-NNNCN</b>                                                      | -1571.447361        | -1571.626060            | -1571.643297 | -1571.311236        | -1571.328473 | 136.27              | 103.78 | -1571.375982        | -1571.377783 |
| <b>TS2</b>                                                            | -1571.428912        | -1571.605925            | -1571.623621 | -1571.294380        | -1571.312076 | 130.49              | 99.22  | -1571.356381        | -1571.359217 |
| <b>P</b>                                                              | -1571.474857        | -1571.648538            | -1571.677871 | -1571.336921        | -1571.366254 | 129.23              | 98.22  | -1571.398322        | -1571.412921 |
| <b>A</b>                                                              | -1571.449659        | -1571.624298            | -1571.641658 | -1571.311802        | -1571.329161 | 124.33              | 94.35  | -1571.370875        | -1571.373989 |
| <b>B</b>                                                              | -1571.428758        | -1571.606040            | -1571.628851 | -1571.291221        | -1571.314032 | 124.15              | 94.21  | -1571.350209        | -1571.358793 |
| <b>C</b>                                                              | -1571.401113        | -1571.579115            | -1571.614315 | -1571.264436        | -1571.299636 | 127.24              | 96.64  | -1571.324889        | -1571.345555 |
| <i>trans</i> -[PdCl(PH <sub>3</sub> ) <sub>2</sub> N <sub>3</sub> ]   | -1438.698880        | -1438.840921            | -1438.855526 | -1438.615727        | -1438.630332 | 115.09              | 87.05  | -1438.670411        | -1438.671692 |
| <b>TS3</b>                                                            | -1571.383292        | -1571.562594            | -1571.577229 | -1571.249443        | -1571.264078 | 133.26              | 101.40 | -1571.312759        | -1571.312258 |

|                                                                                  |              |              |              |              |              |        |        |              |              |
|----------------------------------------------------------------------------------|--------------|--------------|--------------|--------------|--------------|--------|--------|--------------|--------------|
| <b>TS4</b>                                                                       | -1571.368673 | -1571.546602 | -1571.566858 | -1571.235639 | -1571.255894 | 143.34 | 109.37 | -1571.303744 | -1571.307857 |
| <i>trans</i> -[PdCl(PH <sub>3</sub> ) <sub>2</sub> N=C=NMe]                      | -1461.999160 | -1462.148848 | -1462.165292 | -1461.874269 | -1461.890713 | 129.96 | 98.80  | -1461.936018 | -1461.937654 |
| <i>trans</i> -[PdCl(PH <sub>3</sub> ) <sub>2</sub> N <sub>2</sub> ] <sup>+</sup> | -1383.775386 | -1383.90006  | -1383.975992 | -1383.697333 | -1383.773265 | 107.07 | 80.71  | -1383.748208 | -1383.811614 |
| <b>TS5</b>                                                                       | -1571.422202 | -1571.599578 | -1571.617885 | -1571.288668 | -1571.306975 | 132.34 | 100.67 | -1571.351546 | -1571.354808 |

**Table S3.** Calculated total activation and reaction energies ( $E_a$  and  $\Delta E$ ), enthalpies and Gibbs free energies of activation ( $\Delta H^\ddagger$  and  $\Delta G^\ddagger$ ) and reaction ( $\Delta H$  and  $\Delta G$ ) (in kcal/mol) for the gas phase and  $\text{CH}_2\text{Cl}_2$  solution (in parentheses).

| Process                                                                                                                                                                | $E_a$  | $\Delta H^\ddagger$ | $\Delta G^\ddagger$ | $\Delta E$ | $\Delta H$ | $\Delta G$ |
|------------------------------------------------------------------------------------------------------------------------------------------------------------------------|--------|---------------------|---------------------|------------|------------|------------|
| $\text{N}_3^- + \text{trans-}[\text{PdCl}(\text{PH}_3)_2\text{CNMe}]^+ \rightarrow \text{OC1}$                                                                         |        |                     |                     | -92.9      | -105.6     | -94.7      |
|                                                                                                                                                                        |        |                     |                     | (0.1)      | (-12.6)    | (-5.2)     |
| <b>OC1 <math>\rightarrow</math> INT-NNNCN</b>                                                                                                                          | 3.9    | 3.7                 | 4.5                 | -16.8      | -17.8      | -18.2      |
|                                                                                                                                                                        | (3.4)  | (3.3)               | (3.8)               | (-11.6)    | (-12.6)    | (-12.9)    |
| <b>INT-NNNCN <math>\rightarrow</math> P</b>                                                                                                                            | 12.6   | 10.6                | 12.3                | -14.1      | -16.1      | -14.0      |
|                                                                                                                                                                        | (12.4) | (10.3)              | (11.7)              | (-21.7)    | (-23.7)    | (-22.1)    |
| $\text{CNMe} + \text{trans-}[\text{PdCl}(\text{PH}_3)_2\text{N}_3] \rightarrow \text{N}_2 + \text{trans-}[\text{PdCl}(\text{PH}_3)_2\text{N}=\text{C}=\text{NMe}]$     | 23.7   | 20.5                | 33.2                | -68.4      | -67.4      | -67.3      |
|                                                                                                                                                                        | (30.5) | (27.3)              | (36.2)              | (-63.2)    | (-62.2)    | (-62.2)    |
| $\text{CNMe} + \text{trans-}[\text{PdCl}(\text{PH}_3)_2\text{N}_3] \rightarrow \text{trans-}[\text{PdCl}(\text{PH}_3)_2\text{N}_2]^+ + \text{N}=\text{C}=\text{NMe}^-$ | 33.8   | 29.1                | 38.9                | 72.0       | 84.2       | 84.7       |
|                                                                                                                                                                        | (37.0) | (32.4)              | (39.0)              | (-21.6)    | (-9.4)     | (-9.0)     |
| <b>P <math>\rightarrow</math> N<sub>2</sub> + trans-<math>[\text{PdCl}(\text{PH}_3)_2\text{N}=\text{C}=\text{NMe}]</math></b>                                          | 30.7   | 30.3                | 29.4                | -38.2      | -33.0      | -46.9      |
|                                                                                                                                                                        | (37.6) | (37.2)              | (36.5)              | (-30.6)    | (-25.4)    | (-35.2)    |
| <b>OC1 <math>\rightarrow</math> OC2</b>                                                                                                                                |        |                     |                     | -4.4       | -4.6       | -7.7       |
|                                                                                                                                                                        |        |                     |                     | (1.6)      | (1.4)      | (-1.0)     |
|                                                                                                                                                                        |        |                     |                     |            |            |            |
| $\text{N}_3^- + \text{CNMe} \rightarrow \text{N}_2 + \text{N}=\text{C}=\text{NMe}^-$                                                                                   | 18.9   | 14.3                | 24.9                | -62.4      | -63.4      | -63.8      |
|                                                                                                                                                                        | (32.6) | (28.0)              | (35.2)              | (-54.2)    | (-55.2)    | (-55.5)    |
| $\text{N}_3^- + \text{CNMe} \rightarrow \text{CN}_4\text{Me}$                                                                                                          |        |                     |                     | -5.4       | -9.8       | 1.8        |
|                                                                                                                                                                        |        |                     |                     | (1.0)      | (-3.4)     | (4.7)      |

|                                                                                |        |        |        |         |         |         |
|--------------------------------------------------------------------------------|--------|--------|--------|---------|---------|---------|
| $\text{CN}_4\text{Me} \rightarrow \text{N}_2 + \text{N}=\text{C}=\text{NMe}^-$ | 11.2   | 8.8    | 7.0    | -57.1   | -53.6   | -65.6   |
|                                                                                | (14.6) | (12.3) | (10.8) | (-55.3) | (-51.8) | (-60.2) |



**Table S4.** Cartesian atomic coordinates of the calculated equilibrium structures.

| Atom                             | X         | Y         | Z         |
|----------------------------------|-----------|-----------|-----------|
| <b>N<sub>3</sub><sup>-</sup></b> |           |           |           |
| N                                | 0.000000  | 0.000000  | -1.190246 |
| N                                | 0.000000  | 0.000000  | 0.000000  |
| N                                | 0.000000  | 0.000000  | 1.190246  |
| <b>CNMe</b>                      |           |           |           |
| C                                | 1.488263  | 0.000000  | -0.000101 |
| N                                | 0.310865  | -0.000002 | 0.000189  |
| C                                | -1.109253 | -0.000001 | -0.000033 |
| H                                | -1.483532 | 0.876361  | 0.537944  |
| H                                | -1.483042 | 0.027902  | -1.028099 |
| H                                | -1.483537 | -0.904246 | 0.489631  |
| <b>TS<sub>metal-free</sub></b>   |           |           |           |
| N                                | -1.189169 | -1.078643 | 0.000036  |
| N                                | -1.610184 | 0.125368  | -0.000095 |
| N                                | -1.456455 | 1.281930  | 0.000036  |
| N                                | 0.845942  | 0.140190  | 0.000088  |
| C                                | 0.358850  | -1.036246 | -0.000007 |
| C                                | 2.278497  | 0.303634  | -0.000043 |
| H                                | 2.833437  | -0.651955 | -0.000942 |
| H                                | 2.605949  | 0.882101  | 0.881100  |
| H                                | 2.605592  | 0.883608  | -0.880320 |
| <b>CN<sub>4</sub>Me</b>          |           |           |           |
| C                                | 0.236478  | 1.208270  | 0.000053  |
| N                                | -0.552180 | 0.074368  | 0.000409  |
| N                                | 0.173936  | -1.093375 | 0.000122  |
| N                                | 1.407262  | -0.702931 | -0.000161 |
| N                                | 1.488263  | 0.672493  | -0.000099 |
| C                                | -1.989058 | 0.011908  | -0.000193 |
| H                                | -2.352842 | 1.042590  | -0.000750 |
| H                                | -2.376781 | -0.508406 | 0.888062  |
| H                                | -2.375862 | -0.509137 | -0.888363 |
| <b>TS<sub>5 metal-free</sub></b> |           |           |           |
| C                                | -0.192581 | -1.186166 | -0.003889 |
| N                                | 0.607038  | -0.111975 | -0.018853 |
| N                                | -1.445195 | -0.921264 | 0.006565  |
| C                                | 2.030730  | 0.020855  | 0.008495  |
| H                                | 2.527617  | -0.432568 | -0.866252 |
| H                                | 2.494464  | -0.414218 | 0.910633  |
| H                                | 2.254774  | 1.096011  | 0.001604  |
| N                                | -0.321090 | 1.200083  | -0.003655 |
| N                                | -1.455860 | 0.796391  | 0.005426  |
| <b>N<sub>2</sub></b>             |           |           |           |
| N                                | 0.000000  | 0.000000  | 0.552772  |
| N                                | 0.000000  | 0.000000  | -0.552772 |
| <b>N=C=NMe<sup>-</sup></b>       |           |           |           |
| N                                | -1.884851 | 0.273617  | -0.000057 |
| N                                | 0.429435  | -0.651026 | -0.000070 |

|                                                                       |           |           |           |
|-----------------------------------------------------------------------|-----------|-----------|-----------|
| C                                                                     | -0.761244 | -0.124839 | 0.000120  |
| C                                                                     | 1.523644  | 0.287058  | 0.000032  |
| H                                                                     | 1.565828  | 0.967779  | 0.883036  |
| H                                                                     | 1.567900  | 0.965561  | -0.884774 |
| H                                                                     | 2.479784  | -0.264790 | 0.001720  |
| <i>trans</i> -[PdCl(PH <sub>3</sub> ) <sub>2</sub> CNMe] <sup>+</sup> |           |           |           |
| Pd                                                                    | -0.221209 | -0.000096 | 0.000038  |
| C                                                                     | 1.748228  | -0.001715 | 0.000058  |
| N                                                                     | 2.910081  | -0.002251 | 0.000084  |
| C                                                                     | 4.339756  | -0.001547 | -0.000017 |
| Cl                                                                    | -2.548113 | 0.002094  | 0.000066  |
| P                                                                     | -0.464564 | 2.340250  | -0.000080 |
| P                                                                     | -0.469364 | -2.339831 | -0.000080 |
| H                                                                     | 4.695755  | 0.522516  | 0.890292  |
| H                                                                     | 4.697509  | -1.033782 | 0.008792  |
| H                                                                     | 4.695563  | 0.507250  | -0.899209 |
| H                                                                     | -1.196162 | 2.828045  | -1.095128 |
| H                                                                     | 0.659699  | 3.189372  | 0.000013  |
| H                                                                     | -1.196546 | 2.828322  | 1.094580  |
| H                                                                     | 0.652754  | -3.191759 | -0.000243 |
| H                                                                     | -1.202277 | -2.826366 | 1.094643  |
| H                                                                     | -1.202323 | -2.825717 | -1.095062 |
| <b>OC1</b>                                                            |           |           |           |
| C                                                                     | 1.025116  | 1.111696  | -0.421592 |
| N                                                                     | 2.038493  | 1.679097  | -0.496746 |
| C                                                                     | 3.367153  | 2.195654  | -0.523479 |
| Pd                                                                    | -0.653728 | 0.122474  | -0.165960 |
| Cl                                                                    | -2.635248 | -1.139753 | 0.044058  |
| P                                                                     | 0.387440  | -1.893756 | -0.731313 |
| P                                                                     | -2.014706 | 1.942485  | 0.547049  |
| H                                                                     | 3.609219  | 2.521658  | -1.538446 |
| H                                                                     | 4.033239  | 1.391406  | -0.198023 |
| H                                                                     | 3.437641  | 3.044719  | 0.161117  |
| H                                                                     | -0.011471 | -3.083105 | -0.112163 |
| H                                                                     | 1.719663  | -2.012543 | -1.180138 |
| H                                                                     | -0.220624 | -2.134485 | -2.005409 |
| H                                                                     | -1.548763 | 3.270105  | 0.698703  |
| H                                                                     | -3.155492 | 2.188530  | -0.240992 |
| H                                                                     | -2.623996 | 1.767990  | 1.804653  |
| N                                                                     | 3.606575  | -0.783422 | 0.745698  |
| N                                                                     | 2.557159  | -1.210101 | 1.033524  |
| N                                                                     | 1.467300  | -1.655187 | 1.278992  |
| <b>OC2</b>                                                            |           |           |           |
| Pd                                                                    | -0.837909 | 0.066561  | -0.157174 |
| Cl                                                                    | -2.561300 | -1.314438 | 0.681469  |
| P                                                                     | 0.234301  | -1.889903 | -0.792740 |
| P                                                                     | -2.101787 | 1.908117  | 0.553237  |
| N                                                                     | 2.675193  | 0.794275  | -1.738015 |
| N                                                                     | 1.624882  | 1.040284  | -1.318103 |
| N                                                                     | 0.542772  | 1.398399  | -0.898811 |

|                  |           |           |           |
|------------------|-----------|-----------|-----------|
| H                | 0.382539  | -2.874257 | 0.194773  |
| H                | 1.527722  | -1.830344 | -1.349168 |
| H                | -0.449988 | -2.612491 | -1.791244 |
| H                | -1.605867 | 3.204855  | 0.303644  |
| H                | -3.408772 | 2.029506  | 0.040748  |
| H                | -2.385871 | 2.002626  | 1.930385  |
| N                | 3.506996  | -0.369628 | 1.307385  |
| C                | 2.623495  | -1.137433 | 1.378926  |
| C                | 4.560616  | 0.572136  | 1.144298  |
| H                | 5.525764  | 0.072102  | 1.266217  |
| H                | 4.468535  | 1.363312  | 1.893837  |
| H                | 4.490590  | 1.003588  | 0.141822  |
| <b>TS1</b>       |           |           |           |
| C                | -1.039107 | 0.900281  | 0.147698  |
| N                | -1.881396 | 1.658428  | 0.481364  |
| C                | -3.218967 | 2.171422  | 0.410622  |
| Pd               | 0.722813  | 0.023575  | 0.081970  |
| Cl               | 2.822344  | -1.052484 | -0.026381 |
| P                | -0.275425 | -2.081105 | 0.360954  |
| P                | 1.940739  | 1.993812  | -0.255754 |
| H                | -3.223508 | 3.224599  | 0.701244  |
| H                | -3.854826 | 1.590925  | 1.083050  |
| H                | -3.595036 | 2.059839  | -0.610377 |
| H                | -0.251406 | -2.886036 | -0.786679 |
| H                | -1.583131 | -2.236206 | 0.859947  |
| H                | 0.442651  | -2.899325 | 1.262690  |
| H                | 1.322945  | 3.263357  | -0.290329 |
| H                | 2.965750  | 2.241470  | 0.675932  |
| H                | 2.672851  | 2.042459  | -1.456686 |
| N                | -3.921286 | -1.061049 | 0.053609  |
| N                | -2.993072 | -0.875439 | -0.634115 |
| N                | -1.998079 | -0.681101 | -1.284979 |
| <b>INT-NNNCN</b> |           |           |           |
| C                | 1.408765  | 0.000048  | 0.208472  |
| N                | 2.122820  | -0.000109 | 1.254424  |
| C                | 1.536336  | -0.000411 | 2.580585  |
| Pd               | -0.607224 | 0.000008  | -0.031923 |
| Cl               | -3.010443 | 0.000009  | -0.341158 |
| P                | -0.702259 | 2.320900  | -0.088652 |
| P                | -0.702204 | -2.320894 | -0.088991 |
| N                | 4.413429  | 0.000055  | -1.216468 |
| N                | 3.286363  | 0.000179  | -1.081361 |
| N                | 2.036410  | 0.000308  | -1.084552 |
| H                | 0.435425  | -0.000179 | 2.579461  |
| H                | 1.887787  | 0.879676  | 3.132956  |
| H                | 1.887411  | -0.881003 | 3.132398  |
| H                | -1.215492 | 2.856849  | -1.285474 |
| H                | 0.430470  | 3.148852  | 0.073920  |
| H                | -1.573781 | 2.926850  | 0.836926  |
| H                | -1.215026 | -2.856640 | -1.286084 |

|            |           |           |           |
|------------|-----------|-----------|-----------|
| H          | 0.430374  | -3.149004 | 0.073868  |
| H          | -1.574140 | -2.926879 | 0.836171  |
| <b>TS2</b> |           |           |           |
| C          | 1.410187  | 0.007313  | -0.045138 |
| N          | 2.239508  | 0.548136  | 0.741739  |
| C          | 1.985899  | 1.307862  | 1.941076  |
| Pd         | -0.621124 | -0.033913 | -0.009764 |
| Cl         | -3.022399 | -0.104067 | 0.016637  |
| P          | -0.833687 | 2.217110  | -0.553157 |
| P          | -0.564087 | -2.329103 | 0.339042  |
| H          | 2.483130  | 2.282170  | 1.873401  |
| H          | 2.411423  | 0.785592  | 2.805739  |
| H          | 0.913734  | 1.464169  | 2.126531  |
| H          | -1.479317 | 2.453287  | -1.781700 |
| H          | 0.275624  | 3.079152  | -0.697162 |
| H          | -1.639864 | 2.998319  | 0.296837  |
| H          | 0.600597  | -2.985402 | 0.785633  |
| H          | -1.521281 | -2.871606 | 1.218007  |
| H          | -0.834551 | -3.082787 | -0.819295 |
| N          | 4.012280  | -0.169942 | -0.436482 |
| N          | 3.193042  | -0.644453 | -1.106226 |
| N          | 1.888471  | -0.734442 | -1.171253 |
| <b>P</b>   |           |           |           |
| C          | 1.358650  | -0.168375 | -0.226042 |
| N          | 2.340818  | 0.436246  | 0.493563  |
| N          | 3.550943  | 0.031147  | 0.018259  |
| N          | 3.306187  | -0.790672 | -0.945074 |
| N          | 1.959765  | -0.944770 | -1.123047 |
| C          | 2.273642  | 1.367508  | 1.605104  |
| Pd         | -0.636830 | -0.038665 | -0.015319 |
| Cl         | -3.015998 | 0.050585  | 0.184459  |
| P          | -0.769592 | 2.222161  | -0.550777 |
| P          | -0.662109 | -2.341692 | 0.270020  |
| H          | 1.469330  | 1.076196  | 2.284460  |
| H          | 2.103069  | 2.391421  | 1.254744  |
| H          | 3.229496  | 1.329288  | 2.129287  |
| H          | -1.510005 | 2.477149  | -1.719904 |
| H          | 0.368479  | 3.016777  | -0.813625 |
| H          | -1.447105 | 3.059008  | 0.356488  |
| H          | -0.772594 | -3.054602 | -0.938680 |
| H          | 0.435525  | -3.008223 | 0.847412  |
| H          | -1.732286 | -2.893853 | 0.999750  |
| <b>A</b>   |           |           |           |
| C          | -2.105280 | 0.816504  | 0.000087  |
| N          | -3.256621 | 0.096688  | 0.000021  |
| N          | -3.049373 | -1.260132 | -0.000062 |
| N          | -1.784684 | -1.426051 | -0.000053 |
| N          | -1.190255 | -0.184142 | 0.000041  |
| C          | -4.620370 | 0.596338  | 0.000038  |
| Pd         | 0.814366  | 0.038078  | 0.000017  |

|          |           |           |           |
|----------|-----------|-----------|-----------|
| Cl       | 3.138538  | 0.331474  | 0.000045  |
| P        | 0.511071  | 2.357013  | -0.000071 |
| P        | 1.116399  | -2.280237 | -0.000027 |
| H        | -4.570166 | 1.684878  | -0.000049 |
| H        | -5.150151 | 0.248712  | 0.891259  |
| H        | -5.150226 | 0.248568  | -0.891083 |
| H        | 1.701018  | 3.115993  | -0.000156 |
| H        | -0.175918 | 2.928214  | 1.083999  |
| H        | -0.175984 | 2.928014  | -1.084203 |
| H        | 0.582368  | -3.009825 | 1.078630  |
| H        | 0.582596  | -3.009668 | -1.078906 |
| H        | 2.448856  | -2.734762 | 0.000065  |
| <b>B</b> |           |           |           |
| C        | 3.089891  | -1.374790 | 0.000174  |
| N        | 3.252859  | -0.001866 | 0.000086  |
| N        | 2.096407  | 0.686300  | -0.000084 |
| N        | 1.202061  | -0.257258 | -0.000104 |
| N        | 1.744110  | -1.506590 | 0.000044  |
| C        | 4.512847  | 0.719267  | 0.000043  |
| H        | 5.300276  | -0.034218 | 0.000414  |
| H        | 4.596948  | 1.346465  | 0.892473  |
| H        | 4.597242  | 1.345852  | -0.892793 |
| Pd       | -0.798453 | 0.043720  | -0.000023 |
| Cl       | -3.118349 | 0.319887  | 0.000155  |
| P        | -0.524647 | 2.363765  | -0.000050 |
| P        | -1.053324 | -2.289777 | -0.000077 |
| H        | -1.702012 | 3.134724  | 0.000307  |
| H        | 0.174116  | 2.940552  | -1.078215 |
| H        | 0.174828  | 2.940597  | 1.077618  |
| H        | -0.514494 | -2.998015 | -1.086848 |
| H        | -0.514519 | -2.998151 | 1.086614  |
| H        | -2.386551 | -2.747802 | -0.000122 |
| <b>C</b> |           |           |           |
| C        | -3.649067 | 0.066582  | 0.009961  |
| N        | -2.463546 | 0.586147  | 0.406190  |
| N        | -1.414108 | -0.098100 | -0.170829 |
| N        | -1.957009 | -1.045447 | -0.902269 |
| N        | -3.279666 | -0.972454 | -0.827721 |
| C        | -2.242836 | 1.665654  | 1.347164  |
| H        | -3.213992 | 1.895053  | 1.784977  |
| H        | -1.859728 | 2.562757  | 0.848031  |
| H        | -1.546106 | 1.357867  | 2.133544  |
| Pd       | 0.625363  | -0.040000 | -0.003526 |
| Cl       | 2.961743  | -0.073021 | 0.198403  |
| P        | 0.907124  | 2.224338  | -0.552669 |
| P        | 0.553216  | -2.356728 | 0.259089  |
| H        | 1.473805  | 3.062206  | 0.427324  |
| H        | -0.177156 | 3.027229  | -0.969067 |
| H        | 1.802353  | 2.445527  | -1.614715 |
| H        | -0.554351 | -2.940000 | 0.899974  |

|                                                                     |           |           |           |
|---------------------------------------------------------------------|-----------|-----------|-----------|
| H                                                                   | 0.576837  | -3.079695 | -0.946861 |
| H                                                                   | 1.628635  | -2.948150 | 0.949509  |
| <i>trans</i> -[PdCl(PH <sub>3</sub> ) <sub>2</sub> N <sub>3</sub> ] |           |           |           |
| Pd                                                                  | -0.176305 | -0.037037 | 0.000017  |
| Cl                                                                  | -2.033255 | 1.426514  | -0.000290 |
| P                                                                   | 1.156838  | 1.858456  | 0.000251  |
| P                                                                   | -1.678763 | -1.834473 | 0.000055  |
| N                                                                   | 3.630766  | -0.814068 | -0.000604 |
| N                                                                   | 2.503670  | -1.066148 | -0.000141 |
| N                                                                   | 1.338203  | -1.424882 | 0.000448  |
| H                                                                   | 0.977344  | 2.744656  | -1.078428 |
| H                                                                   | 2.562335  | 1.715331  | 0.000075  |
| H                                                                   | 0.977582  | 2.743979  | 1.079526  |
| H                                                                   | -1.150366 | -3.141379 | 0.000426  |
| H                                                                   | -2.585632 | -1.916557 | 1.075304  |
| H                                                                   | -2.585516 | -1.917106 | -1.075250 |
| <b>TS3</b>                                                          |           |           |           |
| Pd                                                                  | -0.810484 | -0.055129 | -0.054441 |
| Cl                                                                  | -3.062760 | -0.674982 | 0.251676  |
| P                                                                   | -1.612262 | 2.123620  | 0.035721  |
| P                                                                   | -0.178434 | -2.323944 | -0.115912 |
| N                                                                   | 2.669284  | 2.134693  | 0.017070  |
| N                                                                   | 1.676462  | 1.560161  | -0.172747 |
| N                                                                   | 1.136085  | 0.431306  | -0.356770 |
| H                                                                   | -2.556710 | 2.461160  | -0.951835 |
| H                                                                   | -0.747963 | 3.235977  | -0.054360 |
| H                                                                   | -2.336076 | 2.461746  | 1.194393  |
| H                                                                   | 0.535650  | -2.830397 | -1.213920 |
| H                                                                   | 0.532502  | -2.887420 | 0.956773  |
| H                                                                   | -1.311786 | -3.165658 | -0.133812 |
| N                                                                   | 3.469123  | -0.217725 | 0.090146  |
| C                                                                   | 2.436320  | -0.828986 | -0.104315 |
| C                                                                   | 4.856927  | -0.497099 | 0.335489  |
| H                                                                   | 5.462885  | -0.050115 | -0.458621 |
| H                                                                   | 5.057168  | -1.574437 | 0.377150  |
| H                                                                   | 5.157802  | -0.037920 | 1.281916  |
| <b>TS4</b>                                                          |           |           |           |
| Pd                                                                  | 0.791310  | -0.001482 | -0.008634 |
| Cl                                                                  | 3.145227  | -0.026996 | 0.379885  |
| P                                                                   | 0.895174  | 2.330933  | 0.002745  |
| P                                                                   | 0.877155  | -2.331126 | -0.161399 |
| N                                                                   | -2.867668 | 0.179491  | -1.820281 |
| N                                                                   | -1.745397 | 0.122586  | -1.304287 |
| N                                                                   | -1.237489 | 0.011236  | -0.189631 |
| H                                                                   | 1.791422  | 2.927710  | -0.905388 |
| H                                                                   | 1.331046  | 2.944624  | 1.194518  |
| H                                                                   | -0.266171 | 3.091698  | -0.252915 |
| H                                                                   | 1.723772  | -2.865078 | -1.152779 |
| H                                                                   | 1.366672  | -3.030690 | 0.960059  |
| H                                                                   | -0.299963 | -3.067961 | -0.415803 |

|                                                                                  |           |           |           |
|----------------------------------------------------------------------------------|-----------|-----------|-----------|
| N                                                                                | -3.512937 | -0.044989 | 0.585505  |
| C                                                                                | -3.964598 | 0.061264  | -0.519372 |
| C                                                                                | -3.632397 | -0.178813 | 1.999418  |
| H                                                                                | -3.171623 | -1.116316 | 2.322329  |
| H                                                                                | -4.687765 | -0.174271 | 2.295102  |
| H                                                                                | -3.115060 | 0.647312  | 2.494368  |
| <i>trans</i> -[PdCl(PH <sub>3</sub> ) <sub>2</sub> N=C=NMe]                      |           |           |           |
| Pd                                                                               | -0.517996 | -0.023869 | -0.108385 |
| Cl                                                                               | -2.665948 | 0.731432  | 0.532985  |
| P                                                                                | 0.143626  | 2.195438  | -0.197301 |
| P                                                                                | -1.177912 | -2.264872 | -0.011342 |
| N                                                                                | 1.278011  | -0.724891 | -0.786944 |
| N                                                                                | 3.487918  | 0.133856  | -0.145012 |
| C                                                                                | 2.360752  | -0.323512 | -0.388126 |
| C                                                                                | 4.383480  | -0.398610 | 0.871397  |
| H                                                                                | -0.396035 | 2.966230  | -1.245913 |
| H                                                                                | 1.516781  | 2.487151  | -0.343582 |
| H                                                                                | -0.187716 | 3.014257  | 0.898871  |
| H                                                                                | -1.262559 | -2.929822 | -1.252022 |
| H                                                                                | -0.330346 | -3.164364 | 0.667631  |
| H                                                                                | -2.424354 | -2.613920 | 0.545362  |
| H                                                                                | 5.252289  | -0.864454 | 0.389832  |
| H                                                                                | 3.910176  | -1.142707 | 1.526157  |
| H                                                                                | 4.758077  | 0.422765  | 1.492332  |
| <i>trans</i> -[PdCl(PH <sub>3</sub> ) <sub>2</sub> N <sub>2</sub> ] <sup>+</sup> |           |           |           |
| Pd                                                                               | -0.000004 | 0.106902  | 0.000005  |
| Cl                                                                               | 0.000238  | -2.182938 | 0.000017  |
| P                                                                                | 2.357652  | -0.141389 | -0.000014 |
| P                                                                                | -2.357629 | -0.141854 | -0.000013 |
| N                                                                                | -0.000382 | 3.260942  | 0.000028  |
| N                                                                                | -0.000237 | 2.154226  | -0.000005 |
| H                                                                                | 2.845202  | -0.867259 | -1.098460 |
| H                                                                                | 2.845250  | -0.867322 | 1.098364  |
| H                                                                                | 3.179364  | 1.002936  | -0.000026 |
| H                                                                                | -2.845030 | -0.867678 | -1.098557 |
| H                                                                                | -2.845056 | -0.868043 | 1.098271  |
| H                                                                                | -3.179581 | 1.002297  | 0.000135  |
| <b>TS5</b>                                                                       |           |           |           |
| C                                                                                | -1.440107 | 0.013174  | -0.074239 |
| N                                                                                | -2.255083 | -0.643278 | 0.669312  |
| N                                                                                | -1.704103 | 0.844749  | -1.043648 |
| C                                                                                | -2.042936 | -1.528926 | 1.784883  |
| Pd                                                                               | 0.642262  | 0.052667  | -0.025014 |
| Cl                                                                               | 3.010677  | 0.076237  | 0.141965  |
| P                                                                                | 0.853431  | -2.188490 | -0.634553 |
| P                                                                                | 0.533224  | 2.339887  | 0.328895  |
| H                                                                                | -1.524426 | -2.457066 | 1.500086  |
| H                                                                                | -3.024020 | -1.813351 | 2.177334  |
| H                                                                                | -1.479250 | -1.053149 | 2.598644  |
| H                                                                                | 1.621921  | -2.398793 | -1.794546 |

|   |           |           |           |
|---|-----------|-----------|-----------|
| H | -0.270326 | -2.987667 | -0.935564 |
| H | 1.529007  | -3.037769 | 0.262890  |
| H | 0.494908  | 3.100605  | -0.853119 |
| H | -0.555929 | 2.893258  | 1.027116  |
| H | 1.618461  | 2.941657  | 0.997238  |
| N | -3.931713 | 0.130147  | -0.280088 |
| N | -3.400168 | 0.799398  | -1.048693 |
